# Supplementary material
Source: Springer Nature journal article supplement (https://www.springermedizin.de/resource/supplementary/12936_2010_1373_MOESM2_ESM.pdf/9549630)

# Symptoms

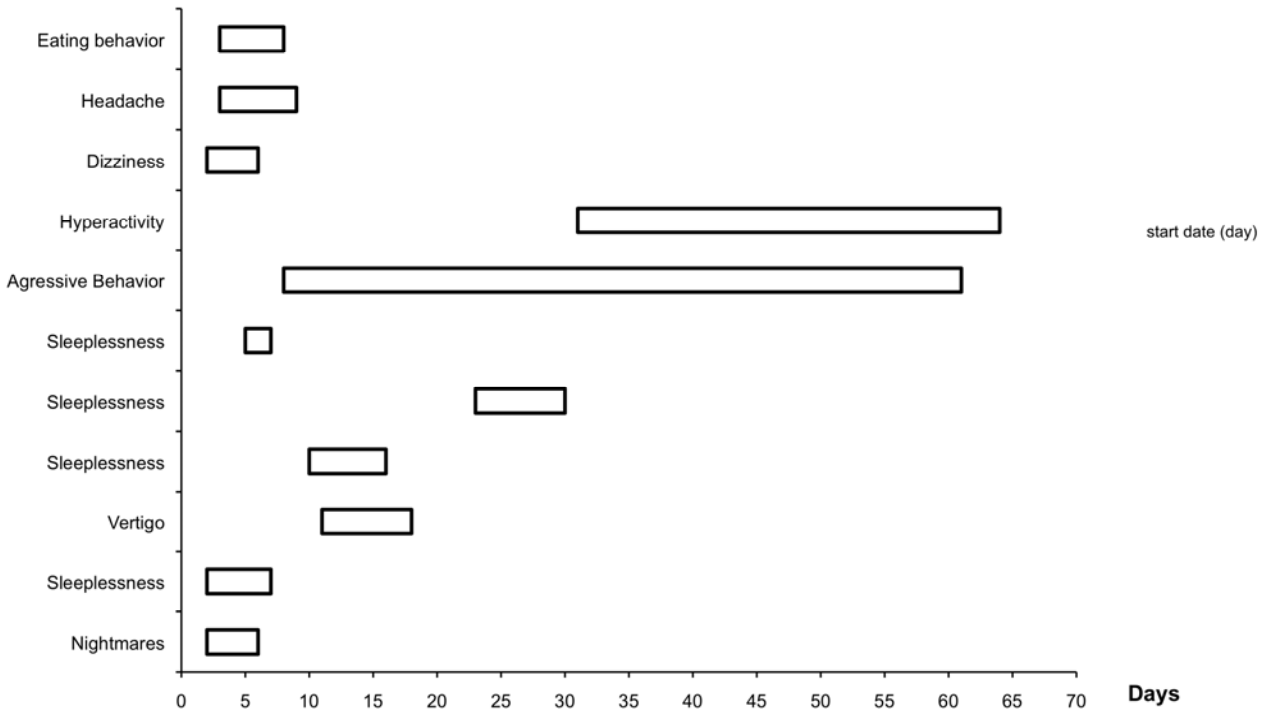

Supplement: MOESM2 [file 9549630]
